# Supplementary material for: Proteolytic signatures define unique thrombin-derived peptides present in human wound fluid in vivo
Source: PubMed Central journal article supplement (PMC5640616; doi:10.1038/s41598-017-13197-3), 2017-10-13
Supplement: 41598_2017_13197_MOESM1_ESM.pdf [file 41598_2017_13197_MOESM1_ESM.pdf]

**SUPPLEMENTARY INFORMATION**

**PROTEOLYTIC SIGNATURES DEFINE UNIQUE THROMBIN-DERIVED PEPTIDES  
PRESENT IN HUMAN WOUND FLUID *IN VIVO***

Rathi Saravanan, Sunil S Adav, Yeu Khai Choong, Mariena J.A. van der Plas, Jitka Petrlova,  
Sven Kjellström, Siu Kwan Sze, Artur Schmidtchen

**Figure S1**

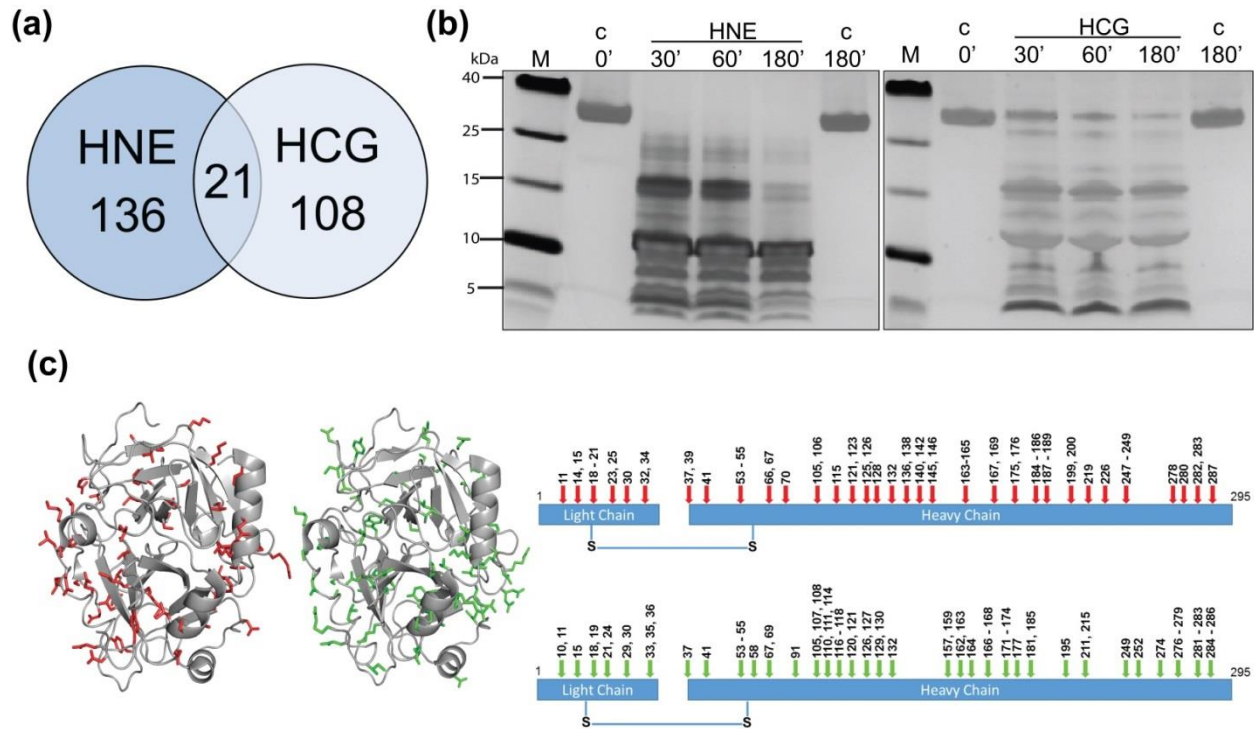

**Figure S1: Proteolytic digestion of thrombin by human neutrophil elastase (HNE) and cathepsin G (HCG).** (a) A Venn-diagram representing the complete degradome of thrombin digested with HNE and HCG. 21 fragments were found common to both human proteases studied. (b) Silver stain image of thrombin incubated with human proteases shows formation of distinct peptide digestion patterns. (c) 3D model and 2D representation of thrombin showing LC-MS/MS identified cleavage points for HNE (red) and HCG (green).

Figure S2

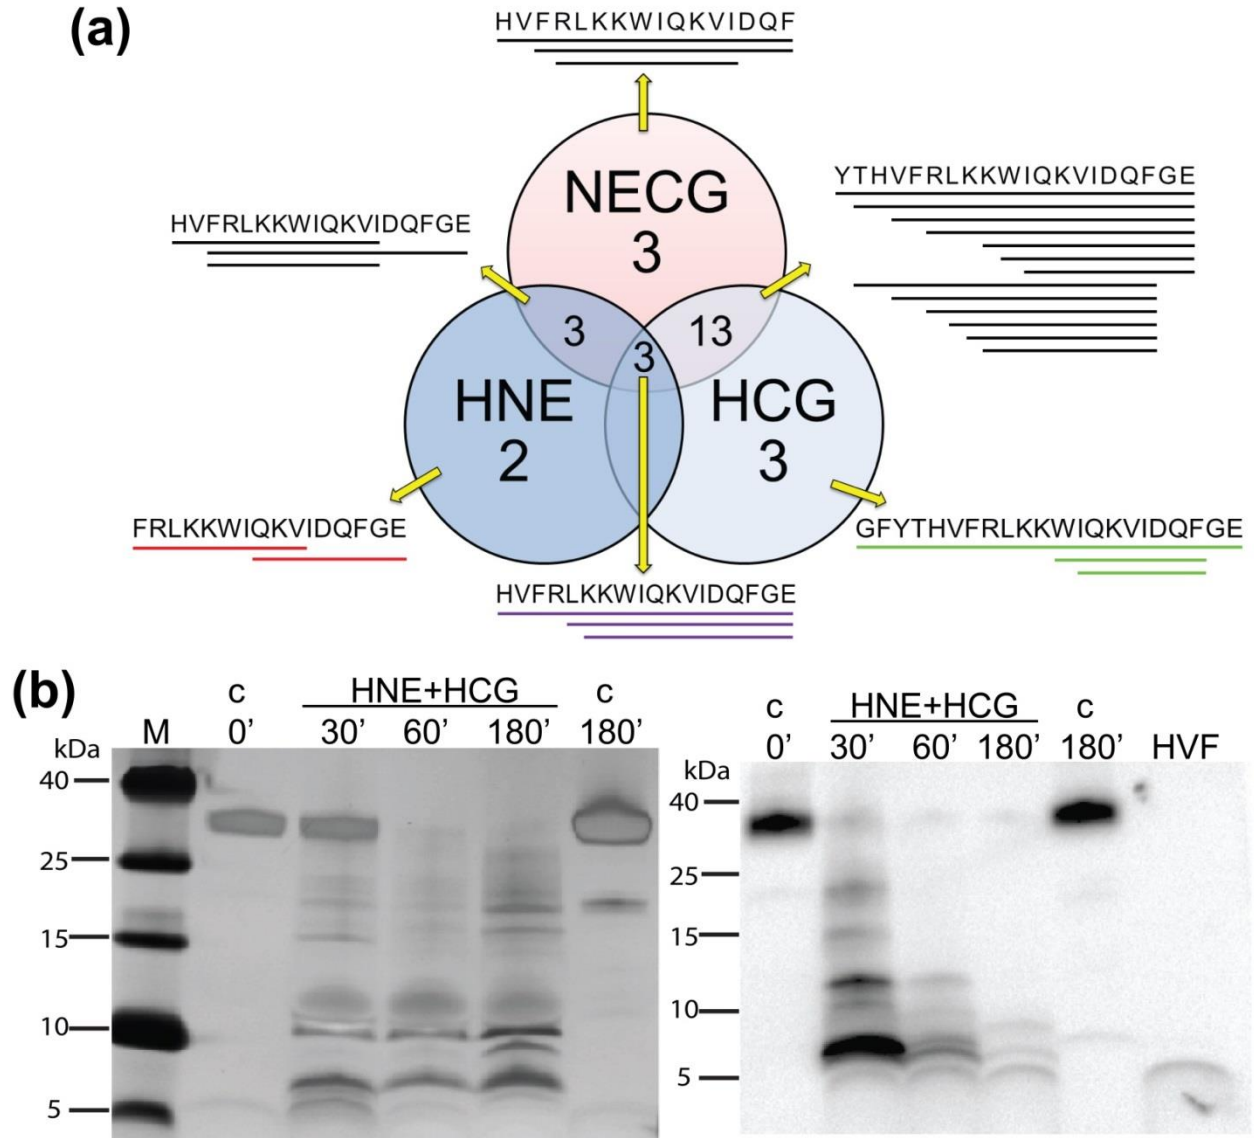

**Figure S2: Combined proteolytic effects of HNE and HCG on thrombin.** (a) Comparison of the digestion pattern of TCPs generated by HNE (red) and HCG (green) individually or in combination of HNE and HCG (black). Peptides identified common in all three *in vitro* digests is shown in purple (b) Silver stain (left) and western blot images (right) of thrombin incubated simultaneously with HNE and HCG at the indicated time points

Figure S3

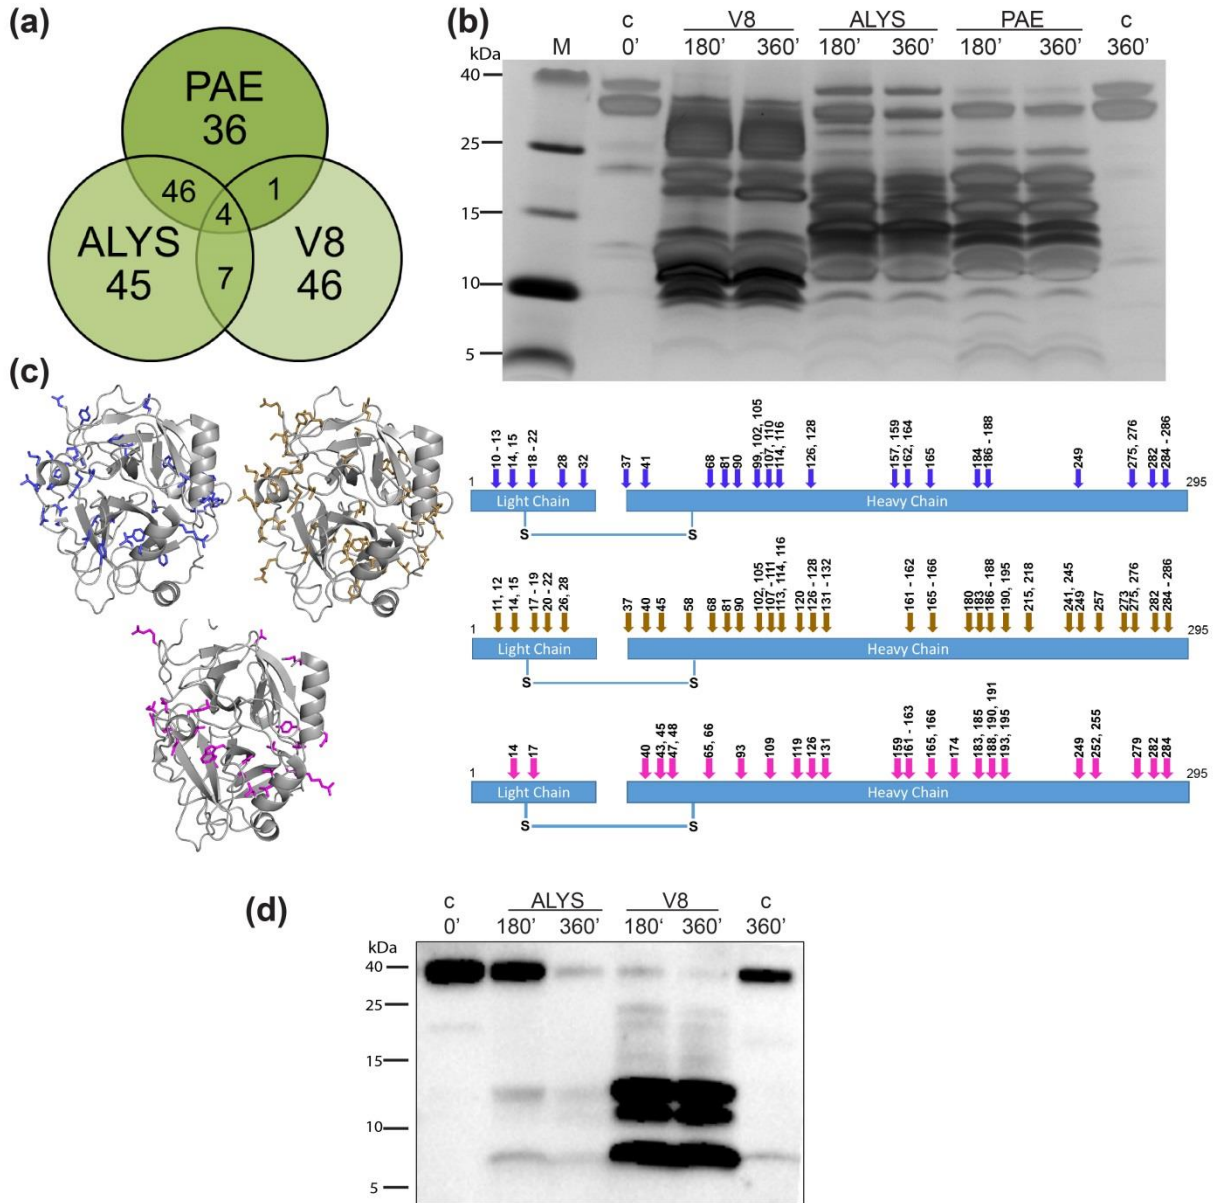

**Figure S3. Proteolytic digestion of thrombin by bacterial proteases.** (a) A Venn-diagram representing the complete degradome of thrombin with PAE, ALYS, and V8. The high number of common sequences between PAE and ALYS highlights the similarities in bacterial M4 peptidase group. (b) Silver stain image shows thrombin digestion patterns by PAE, ALYS and V8 at the indicated time points. (c) 3D model and 2D representation of thrombin showing LC-MS/MS identified cleavage points for PAE (blue), ALYS (brown) and V8 (magenta). (d) Western blot analysis of the thrombin digestion patterns by V8 and ALYS at different exposure times. TCPs generated by ALYS were unambiguously evident at higher exposure time of 20 secs.

Figure S4

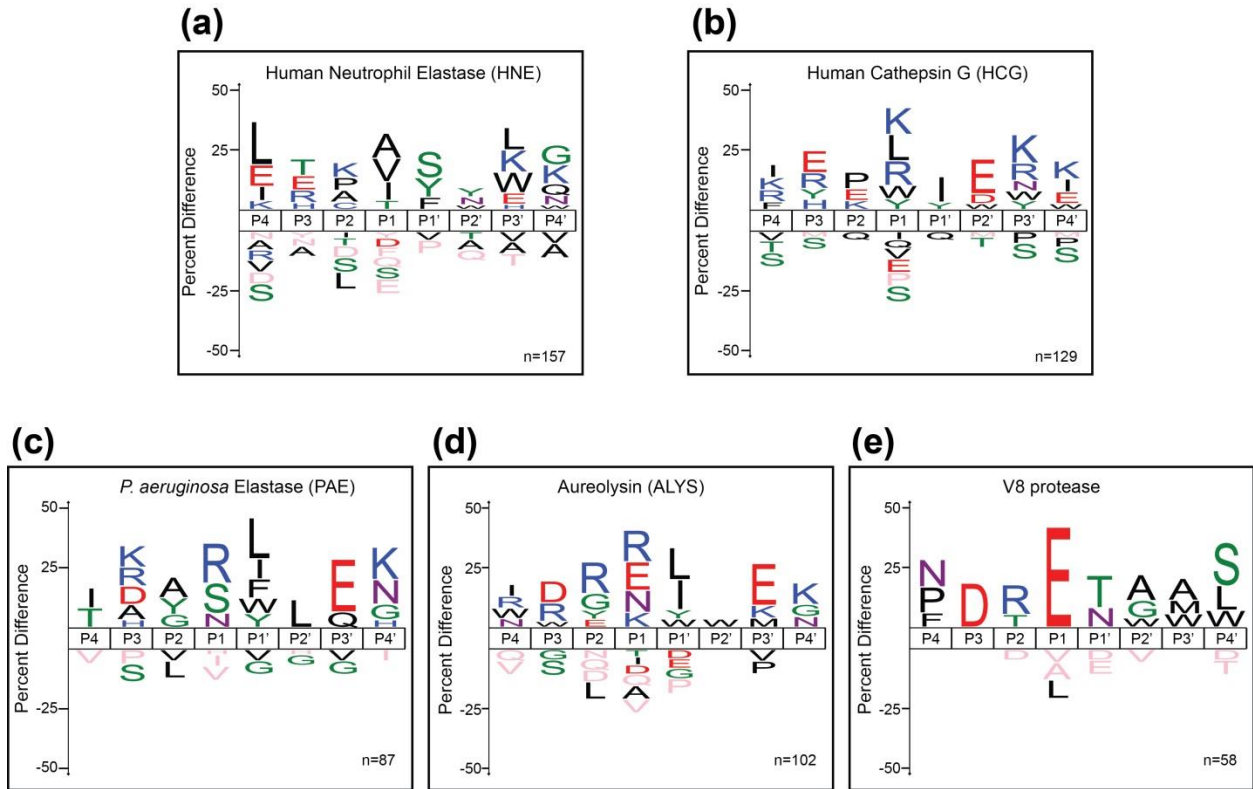

**Figure S4. Substrate specificity profiling of the different human and bacterial proteases studied.** IceLogos representing the P4 to P4' sites for (a) neutrophil elastase (b) cathepsinG (c) *Pseudomonas aeruginosa* elastase (d) *Staphylococcus aureus* aureolysin and (e) V8 proteases. Amino acids that are most frequently observed (above axis) and least frequently observed (below axis) are indicated. The color coding was set as default and the number of cleavage sites used to generate each IceLogo is provided at the bottom right-hand corner.

**Table S1**

**Table S1: Sequences of total thrombin peptides generated common by human neutrophil elastase and cathepsin G**

| Sequences                  | Enzyme(s) |     | Mass (Da)   |              | Cleaving position |
|----------------------------|-----------|-----|-------------|--------------|-------------------|
|                            | HNE       | HCG | Theoretical | Experimental |                   |
| <b>HVFRLKKWIKVIDQFGE</b>   | +         | +   | 2270.269    | 2270.332     | T/H               |
| <b>KKWIKVIDQFGE</b>        | +         | +   | 1617.888    | 1617.967     | L/K               |
| <b>LKKWIKVIDQFGE</b>       | +         | +   | 1730.972    | 1731.117     | R/L               |
| EDKTERELLESYIDGR           | +         | +   | 1951.949    | 1952.186     | L/E               |
| FEKKSLEDKTERELL            | +         | +   | 1863.994    | 1864.055     | L/F               |
| FEKKSLEDKTERELLE           | +         | +   | 1993.037    | 1993.262     | L/F               |
| FEKKSLEDKTERELLESY         | +         | +   | 2243.132    | 2243.194     | L/F               |
| FEKKSLEDKTERELLESYIDG      | +         | +   | 2528.265    | 2528.628     | L/F               |
| SLEDKTERELLESYIDGR         | +         | +   | 2152.065    | 2152.188     | K/S               |
| SLISDRWVL                  | +         | +   | 1087.603    | 1087.603     | A/S               |
| YIHPRYNWRENLDLRDIALMKLKKPV | +         | +   | 3167.718    | 3167.871     | I/Y               |
| YNWRENLDRDIAL              | +         | +   | 1676.827    | 1676.839     | R/Y               |
| YNWRENLDRDIALM             | +         | +   | 1807.868    | 1807.950     | R/Y               |
| FEKKSLEDKTERELLESYIDGR     | +         | +   | 2684.366    | 2684.528     | L/F               |
| IVEGSDAEIGMSPWQVM          | +         | +   | 1879.833    | 1879.875     | R/I               |
| TANVGKGQPSVLQVV            | +         | +   | 1495.836    | 1495.904     | W/T               |
| YNWRENLDRDIA               | +         | +   | 1563.743    | 1563.754     | R/Y               |
| FEKKSLEDKTEREL             | +         | +   | 1750.910    | 1750.946     | L/F               |
| FRKSPQELL                  | +         | +   | 1116.629    | 1116.629     | L/F               |
| LFRKSPQELL                 | +         | +   | 1229.713    | 1229.730     | M/L               |
| YNWRENLDRD                 | +         | +   | 1379.622    | 1379.673     | R/Y               |

\*Sequences highlighted in bold are thrombin C-terminal peptides (TCPs)

**Table S2**

**Table S2: Sequences of total thrombin peptides identified common to the bacterial proteases studied.**

| Sequences                  | Enzyme(s) |      |    | Mass (Da)   |              | Cleaving position |
|----------------------------|-----------|------|----|-------------|--------------|-------------------|
|                            | PAE       | ALYS | V8 | Theoretical | Experimental |                   |
| FYTHVFRLLKKWIQKVIDQFGE     | +         | +    |    | 2681.448    | 2681.599     | G/F               |
| IQKVIDQFGE                 | +         | +    |    | 1175.619    | 1175.648     | W/I               |
| WIQKVIDQFGE                | +         | +    |    | 1361.698    | 1361.697     | K/W               |
| YTHVFRLLKKWIQKVIDQFGE      | +         | +    |    | 2534.380    | 2534.638     | F/Y               |
| AASLLQAGYKGRVTGWGN         | +         | +    |    | 1847.964    | 1847.966     | T/A               |
| ANVGKGQPSVLQVVNLP          | +         | +    |    | 1718.968    | 1719.114     | T/A               |
| DKTERELLESYIDGR            | +         | +    |    | 1822.906    | 1823.261     | S/L               |
| EDKTERELLESYIDGR           | +         | +    |    | 1951.949    | 1952.186     | L/E               |
| FEKKSLEDKTERELLESYIDGR     | +         | +    |    | 2684.366    | 2684.528     | L/F               |
| FTENDLLVR                  | +         | +    |    | 1105.577    | 1105.669     | N/F               |
| FTENDLLVRI                 | +         | +    |    | 1218.661    | 1218.691     | N/F               |
| HSRTRYERNIEKISMLEKIYIHPRYN | +         | +    |    | 3345.752    | 3345.978     | K/H               |
| ISMLEKIYIHPRYN             | +         | +    |    | 1775.939    | 1776.059     | K/I               |
| IVEGSDAEIGMSPWQ            | +         | +    |    | 1617.735    | 1617.732     | R/I               |
| IVEGSDAEIGMSPWQVM          | +         | +    |    | 1879.833    | 1879.875     | R/I               |
| IVEGSDAEIGMSPWQVMLFR       | +         | +    |    | 2264.097    | 2264.239     | R/I               |
| IVEGSDAEIGMSPWQVMLFRK      | +         | +    |    | 2392.192    | 2392.525     | R/I               |
| IVEGSDAEIGMSPWQVMLFRKSPQE  | +         | +    |    | 2833.378    | 2833.737     | R/I               |
| IVEGSDAEIGMSPWQVMLFRKSPQEL | +         | +    |    | 2946.462    | 2946.454     | R/I               |
| KSLEDKTERELLESYIDGR        | +         | +    |    | 2280.160    | 2280.230     | K/K               |
| LEDKTERELLESYIDGR          | +         | +    |    | 2065.033    | 2065.166     | S/L               |
| LFEKKSLEDKTERELLES         | +         | +    |    | 2193.153    | 2193.278     | P/L               |
| LISDRWVLT                  | +         | +    |    | 1101.618    | 1101.618     | S/L               |
| LLESYIDGR                  | +         | +    |    | 1064.550    | 1064.582     | E/L               |
| LLQAGYKGRVTGWG             | +         | +    |    | 1504.815    | 1504.899     | S/L               |
| LLQAGYKGRVTGWGN            | +         | +    |    | 1618.858    | 1618.947     | S/L               |
| LLQAGYKGRVTGWGNLKET        | +         | +    |    | 2090.127    | 2090.246     | S/L               |
| LLYPPWCKNFTENDLLVR         | +         | +    |    | 2233.142    | 2233.443     | C/L               |
| LRPLFEKKSLEDKTERELLESYIDGR | +         | +    |    | 3163.688    | 3164.103     | G/L               |
| MLEKIYIHPRYNWRENLDRIA      | +         | +    |    | 2844.449    | 2844.448     | S/M               |
| NIEKISMLEKIYIHPR           | +         | +    |    | 1983.098    | 1983.199     | R/N               |
| NIEKISMLEKIYIHPRYN         | +         | +    |    | 2260.204    | 2260.304     | R/N               |
| NVGKGQPSVLQVVNLP           | +         | +    |    | 1647.931    | 1648.028     | A/N               |
| RPLFEKKSLEDKTERELLESYIDGR  | +         | +    |    | 3050.604    | 3051.183     | L/R               |
| SLEDKTERELLESYIDGR         | +         | +    |    | 2152.065    | 2152.188     | K/S               |

**Table S2 (continued)**

| Sequences               | Enzyme(s) |      |    | Mass (Da)   |              | Cleaving position |
|-------------------------|-----------|------|----|-------------|--------------|-------------------|
|                         | PAE       | ALYS | V8 | Theoretical | Experimental |                   |
| TRYERNIEKISMLEKIYIHPR   | +         | +    |    | 2688.453    | 2688.819     | R/T               |
| TRYERNIEKISMLEKIYIHPRYN | +         | +    |    | 2965.560    | 2965.681     | R/T               |
| VGKGQPSVLQVVNLP         | +         | +    |    | 1533.888    | 1533.974     | N/V               |
| WRENLRDIAL              | +         | +    |    | 1399.721    | 1399.797     | N/W               |
| WRENLRDIALMK            | +         | +    |    | 1658.856    | 1658.871     | N/W               |
| WRENLRDIALMKLKKP        | +         | +    |    | 2125.183    | 2125.322     | N/W               |
| WRENLRDIALMKLKKPVA      | +         | +    |    | 2295.289    | 2295.440     | N/W               |
| YERNIEKISMLEKIYIHPR     | +         | +    |    | 2431.305    | 2431.443     | R/Y               |
| YERNIEKISMLEKIYIHPRYN   | +         | +    |    | 2708.411    | 2708.594     | R/Y               |
| YNWRENLRDIALMKLKKP      | +         | +    |    | 2402.289    | 2402.466     | R/Y               |
| YNWRENLRDIALMKLKKPVA    | +         | +    |    | 2572.395    | 2572.509     | R/Y               |
| GSDAEIGMSPWQVMLFRKSPQE  |           | +    | +  | 2492.183    | 2492.729     | E/G               |
| IGMSPWQVMLFRKSPQE       |           | +    | +  | 2033.023    | 2033.163     | E/I               |
| KKSLEDKTERELLESYIDGR    |           | +    | +  | 2408.255    | 2408.330     | E/K               |
| LQAGYKGRVTGWGNLKE       |           | +    | +  | 1875.996    | 1876.428     | L/L               |
| TAASLLQAGYKGRVTGWGNLKE  |           | +    | +  | 2319.234    | 2319.327     | E/T               |
| TWTANVGKGQPSVLQ         |           | +    | +  | 1584.826    | 1585.120     | E/T               |
| YNWRENLRDIALMK          |           | +    | +  | 1935.963    | 1935.961     | R/Y               |
| SPFNRRWYQ               | +         |      | +  | 1210.552    | 1210.551     | K/S               |
| <b>KWIQKVIDQFGE</b>     | +         | +    | +  | 1489.793    | 1489.915     | K/K               |
| <b>LKKWIQKVIDQFGE</b>   | +         | +    | +  | 1730.972    | 1731.117     | R/L               |
| LFEKKSLEDKTERELLESYIDGR | +         | +    | +  | 2797.450    | 2797.723     | P/L               |
| LLQAGYKGRVTGWGNLKE      | +         | +    | +  | 1989.080    | 1989.431     | S/L               |

\*Sequences highlighted in bold are thrombin C-terminal peptides (TCPs)



**Table S3**

**Table S3: Sequences of thrombin C-terminal peptides identified unique and common to acute wound fluid (AWF) and chronic wound fluid (CWF)**

| Sequences             | Source(s) |    |     |     | Mass (Da)   |              |
|-----------------------|-----------|----|-----|-----|-------------|--------------|
|                       | HP        | BP | AWF | CWF | Theoretical | Experimental |
| IQKVIDQFG             |           |    | +   |     | 1046.565    | 1046.575     |
| IDQFGE                |           |    | +   |     | 707.302     | 707.313      |
| VIDQFGE               |           |    |     | +   | 806.370     | 806.379      |
| KVIDQFGE              |           |    | +   | +   | 934.465     | 934.475      |
| IQKVIDQF              | +         |    | +   |     | 989.544     | 989.554      |
| FRLKKWIQKVIDQFGE      | +         |    |     | +   | 2034.131    | 2034.142     |
| HVFRLKKWIQKVIDQFGE    | +         |    |     | +   | 2270.269    | 2270.267     |
| FYTHVFRLKKWIQKVIDQFGE |           | +  |     | +   | 2681.448    | 2681.446     |
| KKWIQKVIDQFGE         | +         |    | +   | +   | 1617.888    | 1617.892     |
| QKVIDQFGE             | +         |    | +   | +   | 1062.524    | 1062.531     |
| LKKWIQKVIDQFGE        | +         | +  | +   | +   | 1730.972    | 1730.970     |
| KWIQKVIDQFGE          | +         | +  | +   | +   | 1489.793    | 1489.793     |
| WIQKVIDQFGE           | +         | +  | +   | +   | 1361.698    | 1361.698     |
| IQKVIDQFGE            | +         | +  | +   | +   | 1175.619    | 1175.618     |

**Table S4**

**Table S4: Peptide sequences identified in the study containing fragments of previously reported bio-active thrombin peptides**

| Sequences                                | Enzyme (s) |     |     |      |    | Mass (Da)   |              |
|------------------------------------------|------------|-----|-----|------|----|-------------|--------------|
|                                          | HNE        | HCG | PAE | ALYS | V8 | Theoretical | Experimental |
| FNPRTFGSGEADCGLRPLFEKKSLEDKTERELLESYIDGR |            |     | +   |      |    | 4659.303    | 4659.615     |
| GLRPLFEKKSLEDKTERELLESYIDGR              |            |     | +   |      |    | 3220.709    | 3220.898     |
| GLRPLFEKKSLEDKTERELLESY                  |            | +   |     |      |    | 2779.476    | 2780.182     |
| LRPLFEKKSLEDKTERELLESYIDGR               |            |     | +   | +    |    | 3163.688    | 3164.103     |
| LRPLFEKKSLEDKTERELLESYI                  | +          |     |     |      |    | 2835.538    | 2836.125     |
| LRPLFEKKSLEDKTERELLESY                   |            | +   |     |      |    | 2722.454    | 2722.676     |
| LRPLFEKKSLEDKTERELLES                    | +          |     |     |      |    | 2559.391    | 2559.809     |
| RPLFEKKSLEDKTERELLESYIDGR                |            |     | +   | +    |    | 3050.604    | 3051.183     |
| PLFEKKSLEDKTERELLESYIDGR                 |            |     | +   |      |    | 2894.503    | 2894.998     |
| LFEKKSLEDKTERELLESYIDGRIVEG              |            |     | +   |      |    | 3195.666    | 3196.674     |
| LFEKKSLEDKTERELLESYIDGR                  | +          |     | +   | +    | +  | 2797.450    | 2797.723     |
| LFEKKSLEDKTERELLESYIDG                   |            |     | +   |      |    | 2641.349    | 2641.585     |
| LFEKKSLEDKTERELLESY                      |            |     | +   |      |    | 2356.216    | 2356.513     |
| LFEKKSLEDKTERELLES                       | +          |     | +   | +    |    | 2193.153    | 2193.278     |
| LFEKKSLEDKTERELLE                        |            |     | +   |      |    | 2106.121    | 2106.141     |
| FEKKSLEDKTERELLESYIDGRIVEG               |            | +   |     |      |    | 3082.582    | 3082.578     |
| FEKKSLEDKTERELLESYIDGRIV                 | +          |     |     |      |    | 2896.518    | 2896.616     |
| FEKKSLEDKTERELLESYIDGRI                  | +          |     |     |      |    | 2797.450    | 2797.953     |
| FEKKSLEDKTERELLESYIDGR                   | +          | +   | +   | +    |    | 2684.366    | 2684.528     |
| FEKKSLEDKTERELLESYIDG                    | +          | +   |     |      |    | 2528.265    | 2528.628     |
| FEKKSLEDKTERELLESYID                     |            | +   |     |      |    | 2471.243    | 2471.920     |
| FEKKSLEDKTERELLESYI                      | +          |     |     |      |    | 2356.216    | 2356.274     |
| FEKKSLEDKTERELLESY                       | +          | +   | +   |      |    | 2243.132    | 2243.194     |
| FEKKSLEDKTERELLES                        | +          |     |     |      |    | 2080.069    | 2080.106     |
| FEKKSLEDKTERELLE                         | +          | +   |     |      |    | 1993.037    | 1993.262     |
| FEKKSLEDKTERELL                          | +          | +   |     |      |    | 1863.994    | 1864.055     |
| FEKKSLEDKTEREL                           | +          | +   |     |      |    | 1750.910    | 1750.946     |
| KKSLEDKTERELLESYIDGR                     |            |     |     | +    | +  | 2408.255    | 2408.330     |
| KKSLEDKTERELLESYIDG                      |            |     |     | +    |    | 2252.154    | 2252.583     |
| KKSLEDKTERELLESY                         |            |     |     | +    |    | 1967.021    | 1967.116     |
| KSLEDKTERELLESYIDGR                      |            | +   | +   | +    |    | 2280.160    | 2280.230     |
| KSLEDKTERELLESYI                         | +          |     |     |      |    | 1952.010    | 1952.008     |
| KSLEDKTERELLESY                          |            | +   |     |      |    | 1838.926    | 1839.068     |
| SLEDKTERELLESYIDGR                       | +          | +   | +   | +    |    | 2152.065    | 2152.188     |

**Table S4 (continued)**

| Sequences                                  | Enzyme (s) |     |     |      |    | Mass (Da)   |              |
|--------------------------------------------|------------|-----|-----|------|----|-------------|--------------|
|                                            | HNE        | HCG | PAE | ALYS | V8 | Theoretical | Experimental |
| SLEDKTERELLESYI                            | +          |     |     |      |    | 1823.915    | 1823.913     |
| SLEDKTERELLESY                             |            | +   |     |      |    | 1710.831    | 1710.844     |
| SLEDKTERELLES                              | +          |     |     |      |    | 1547.768    | 1547.767     |
| SLEDKTERELLE                               |            | +   |     |      |    | 1460.736    | 1460.782     |
| LEDKTERELLESYIDGR                          |            |     | +   | +    |    | 2065.033    | 2065.166     |
| LEDKTERELLESYIDG                           |            |     | +   |      |    | 1908.932    | 1909.577     |
| LEDKTERELLESYID                            |            |     | +   |      |    | 1851.910    | 1852.110     |
| LEDKTERELLESYI                             | +          |     |     |      |    | 1736.883    | 1736.884     |
| LEDKTERELLESY                              |            |     |     | +    |    | 1623.799    | 1623.797     |
| LEDKTERELLES                               |            |     | +   |      |    | 1460.736    | 1460.736     |
| EDKTERELLESYIDGR                           | +          | +   | +   | +    |    | 1951.949    | 1952.186     |
| EDKTERELLESYI                              | +          |     |     |      |    | 1623.799    | 1623.797     |
| EDKTERELLESY                               |            | +   |     |      |    | 1510.715    | 1510.784     |
| DKTERELLESYIDGR                            |            |     | +   | +    |    | 1822.906    | 1823.261     |
| KTERELLESYIDGR                             | +          |     |     |      |    | 1707.879    | 1708.008     |
| TERELLESYIDGR                              |            | +   |     |      |    | 1579.784    | 1579.784     |
| TERELLESY                                  |            | +   |     |      |    | 1138.551    | 1138.836     |
| ERELLESYIDGR                               | +          |     |     |      |    | 1478.737    | 1478.737     |
| ERELLESYI                                  | +          |     |     |      |    | 1150.587    | 1150.587     |
| RELLESYIDGR                                |            |     |     | +    |    | 1349.694    | 1349.755     |
| LLESYIDGR                                  |            |     | +   | +    |    | 1064.550    | 1064.582     |
| TDNMFCAGYKPDEGKRGDACEGDSGGPFV MKSPFN R WYQ |            |     |     | +    |    | 4588.957    | 4588.789     |
| DNMFCAGYKPDEGKRGDACEGDSGGPFV MK            | +          |     |     |      |    | 3294.384    | 3296.404     |
| YKPDEGKRGDACEGDSGGPFV MK                   | +          |     |     |      |    | 2499.116    | 2499.111     |
